# Supplementary material
Source: Springer Nature journal article supplement (https://www.springermedizin.de/resource/supplementary/12889_2013_5479_MOESM1_ESM.pdf/9495452)

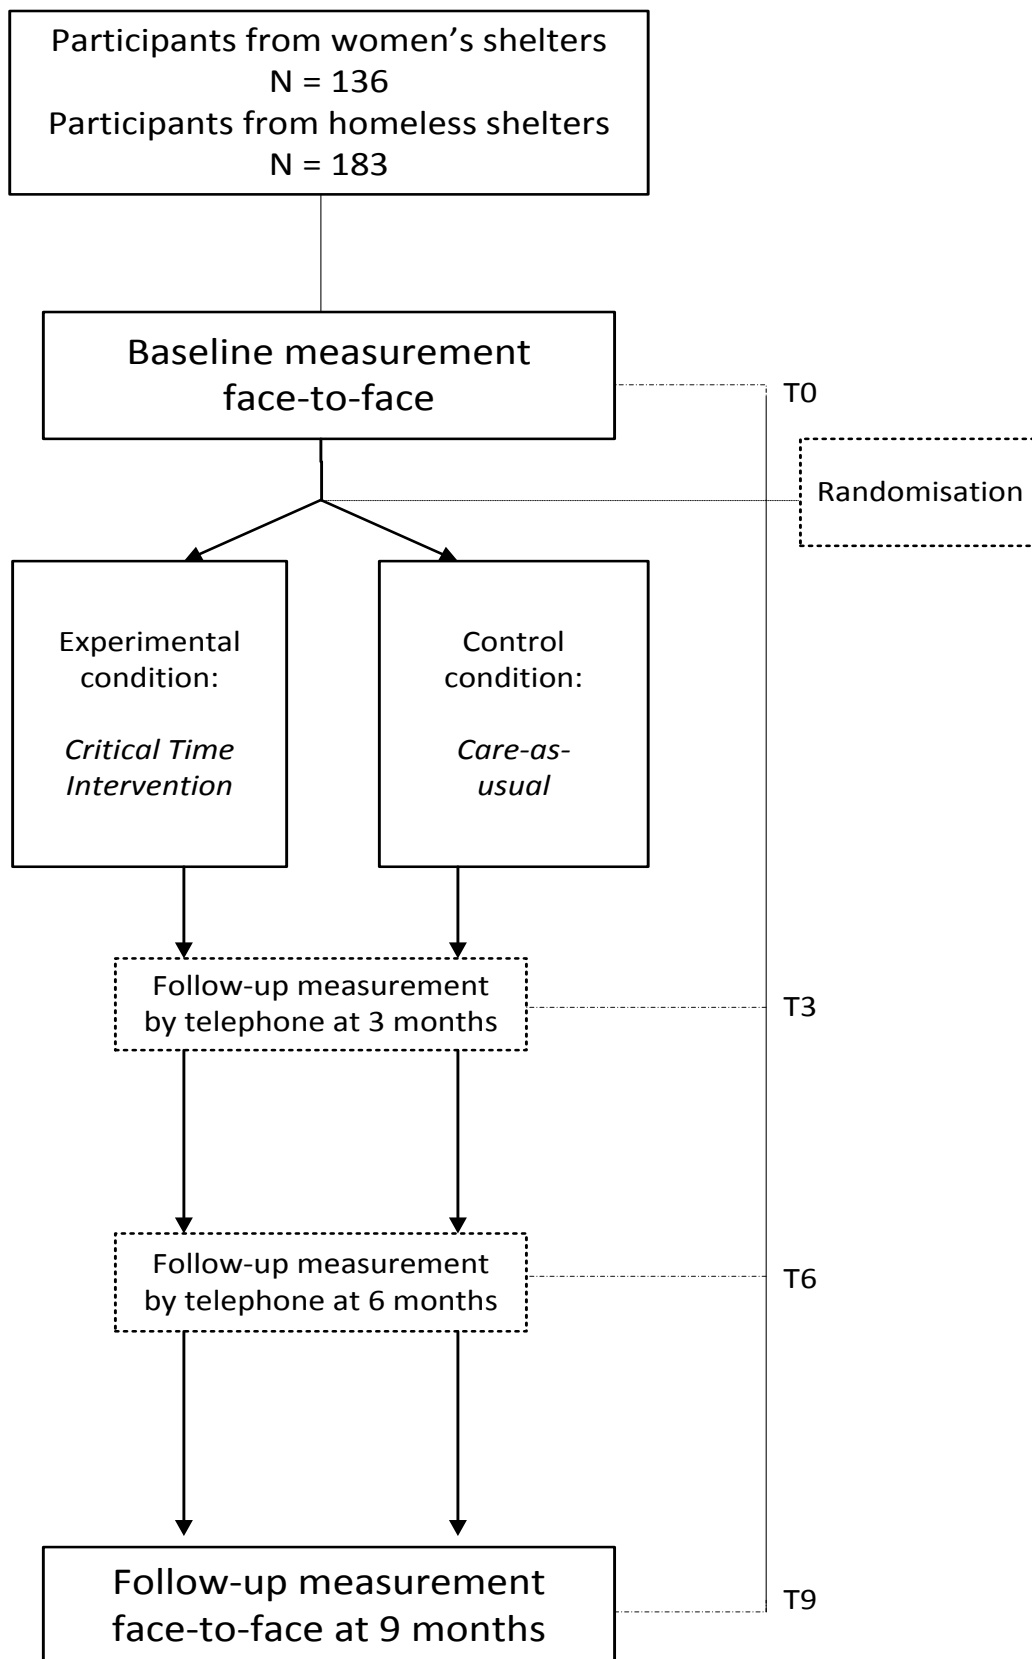

Figure 1 Flowchart of the RCTs and measurements.

Supplement: MOESM1 [file 9495452]
